# Supplementary material
Source: PubMed Central journal article supplement (PMC124402)

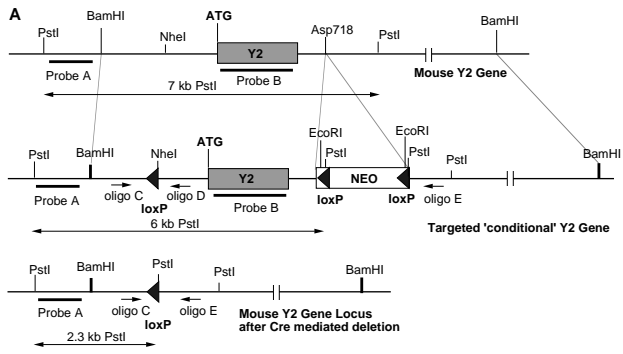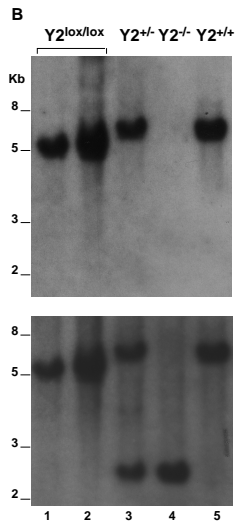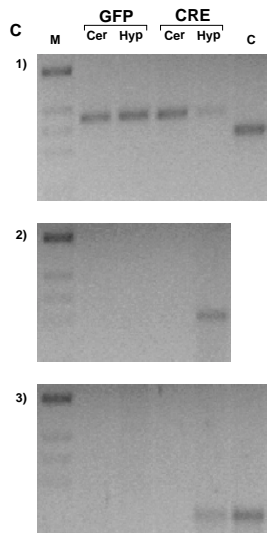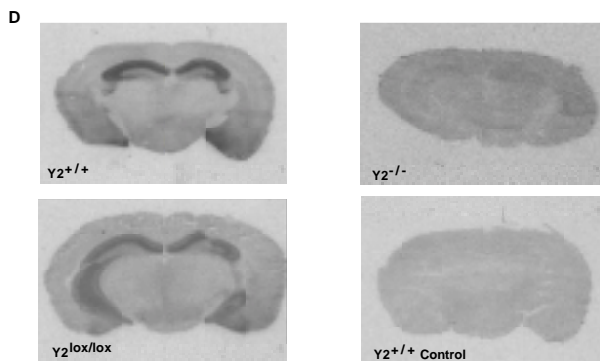

Supplement: pnas_132043299_2.pdf [file pnas_132043299_2.pdf]
